# Supplementary material
Source: publisher figshare collection journal article supplement (https://acs.figshare.com/ndownloader/files/4486810)
Supplement: Supplementary file 1 [file 4486810]

## Supporting Information

### A Combination of a Fluorescent Dye and a Zn-S cluster and its Biological Application as a Stain for Bacteria

Jingli Xie<sup>\*,†,⊥</sup> Siyu Cao,<sup>‡</sup> David Good,<sup>‡</sup> Mingqian Wei,<sup>‡</sup> and Xiaoming Ren<sup>§</sup>

<sup>†</sup> *School of Chemistry & Bio21 Molecular Science and Biotechnology Institute, The University of Melbourne, Parkville, Victoria 3010, Australia*

<sup>‡</sup> *School of Medical Science, Griffith University, Gold Coast, Queensland 4222, Australia*

<sup>§</sup> *College of Science, Nanjing University of Technology, Nanjing 210009, P. R. China*

<sup>⊥</sup> *Present address: School of Chemistry, Monash University, Clayton, Victoria 3800, Australia*

\* To whom correspondence should be addressed.

E-mail: xij@unimelb.edu.au

### Materials and General Procedures

All starting materials and solvents were purchased from commercial sources and used without further purification. The IR spectra in the range 4000-400 cm<sup>-1</sup> were recorded on a PerkinElmer Spectrum One FT-IR Spectrometer. Elemental analyses were carried out in Chemical & MicroAnalytical Services Pty. Ltd., Belmont, VIC, Australia. UV-vis spectra were recorded on UV-1650 PC spectrophotometer (double cell mode, baseline correction was performed a wavelength scan from 800 nm to 200 nm). <sup>1</sup>H NMR spectra were recorded on an INOVA 400 spectrometer (400 MHz, (CD<sub>3</sub>)<sub>2</sub>SO, 25°C). Fluorescence measurements were performed on Varian Cary Eclipse fluorescence spectrophotometer.

### Crystallography

Crystal data, details of the data collection and refinement are summarized in Table 1. Crystal structure was solved using direct methods (SHELXTL V5.1<sup>1</sup>) from single-

crystal data collected at 130 K on a Bruker SMART/CCD area detector diffractometer fitted with Mo K $_{\alpha}$  radiation ( $\lambda = 0.71073 \text{ \AA}$ ) and a graphite monochromator. Structure refinements were performed using the SHELX97 program,<sup>2</sup> which uses a full-matrix least-squares refinement based on  $F^2$ . Absorption corrections were performed using the SADABS program.<sup>3</sup>

**Note:** Some unsatisfactory aspects in relation to the refinement have arisen as a consequence of a low reflection to parameter ratio for this structure. The reason for the low ratio is the relatively weak nature of the diffraction. The surface  $-\text{SC}_6\text{H}_5$  ligands have severe disorder and this is responsible for the elevated agreement values ( $R$  values) found for this structure. Despite these difficulties, the atomic positions are well resolved in the crystal structure analysis.

#### References:

- (1) Sheldrick, G. M. *SHELXTL V5.1 Software Reference Manual*, Bruker AXS, Inc., Madison, USA, **1997**.
- (2) Sheldrick, G. M. SHELX97, *Programs for Crystal Structure Analysis*; Institut für Anorganische Chemie der Universität: Göttingen, Germany, **1998**.
- (3) Sheldrick, G. M. *SADABS, V2.01, Empirical Absorption Correction Program*, Institut für Anorganische Chemie der Universität: Göttingen, Germany, **1996**.

**Table1.** Summary of crystal and structure refinement data for compound **1**

| Compound                                            | <b>1</b>                                                                         |
|-----------------------------------------------------|----------------------------------------------------------------------------------|
| Empirical formula                                   | C <sub>105</sub> H <sub>93</sub> N <sub>3</sub> OS <sub>16</sub> Zn <sub>8</sub> |
| Formula weight                                      | 2449.13                                                                          |
| Crystal system                                      | Monoclinic                                                                       |
| Space group                                         | C2/c                                                                             |
| <i>a</i> / Å                                        | 27.752(9)                                                                        |
| <i>b</i> / Å                                        | 25.752(8)                                                                        |
| <i>c</i> / Å                                        | 33.771(11)                                                                       |
| $\alpha$ / °                                        | 90                                                                               |
| $\beta$ / °                                         | 103.656(5)                                                                       |
| $\gamma$ / °                                        | 90                                                                               |
| <i>V</i> / Å <sup>3</sup>                           | 23453(13)                                                                        |
| <i>Z</i>                                            | 8                                                                                |
| <i>D<sub>c</sub></i> / Mg m <sup>-3</sup>           | 1.334                                                                            |
| Abs coeff. / mm <sup>-1</sup>                       | 1.934                                                                            |
| Max. and min. transmission                          | 0.671 and 0.609                                                                  |
| <i>F</i> (000)                                      | 9240                                                                             |
| Crystal size / mm                                   | 0.47 × 0.22 × 0.21                                                               |
| $\theta$ / deg                                      | 1.17 to 27.59                                                                    |
| Limiting indices                                    | -35 ≤ <i>h</i> ≤ 31<br>-25 ≤ <i>k</i> ≤ 33<br>-43 ≤ <i>l</i> ≤ 42                |
| Reflns collected / unique                           | 67119 / 26441<br>[ <i>R</i> (int) = 0.2729]                                      |
| Data / restraints / params                          | 26441 / 0 / 534                                                                  |
| Goodness-of-fit on <i>F</i> <sup>2</sup>            | 1.012                                                                            |
| Final <i>R</i> indices [ <i>I</i> > 2σ( <i>I</i> )] | <i>R</i> <sub>1</sub> = 0.1640<br><i>wR</i> <sub>2</sub> = 0.3800                |
| <i>R</i> indices (all data)                         | <i>R</i> <sub>1</sub> = 0.3798<br><i>wR</i> <sub>2</sub> = 0.4952                |

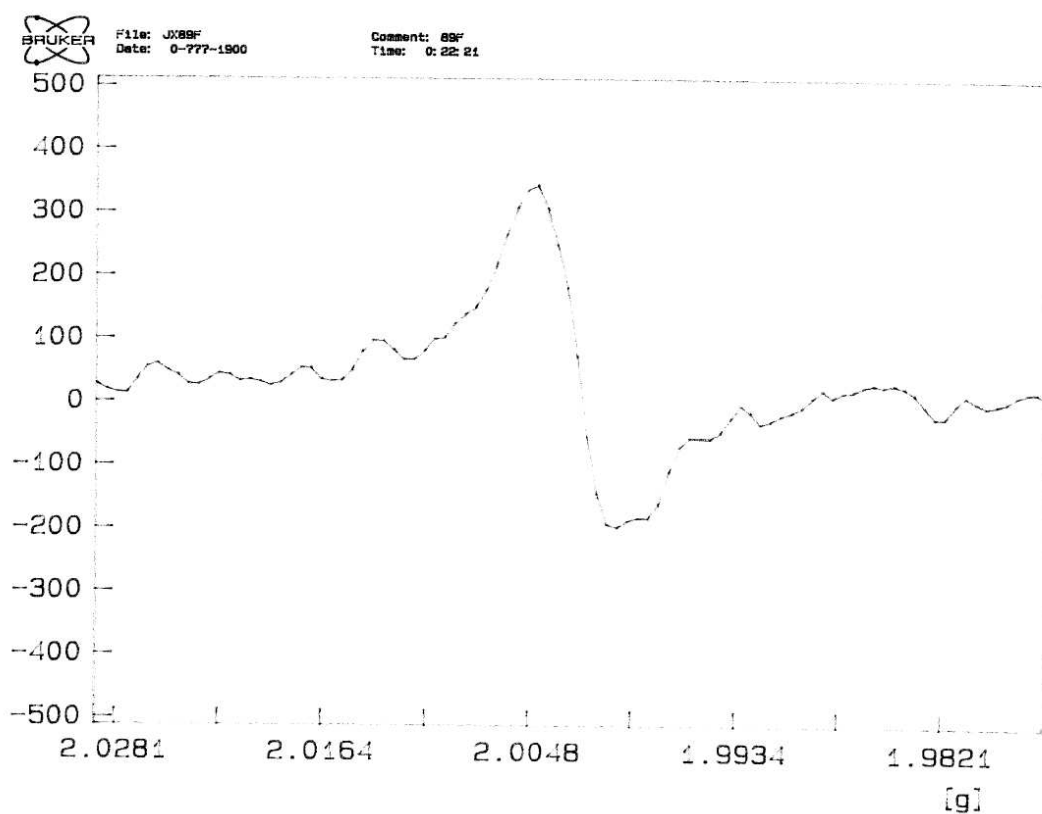

**Figure S1.** ESR spectrum of **1** at room temperature.

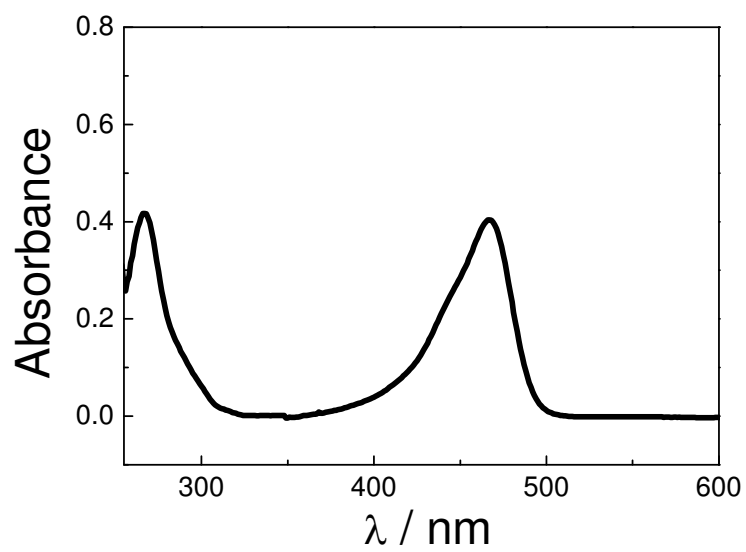

(a)

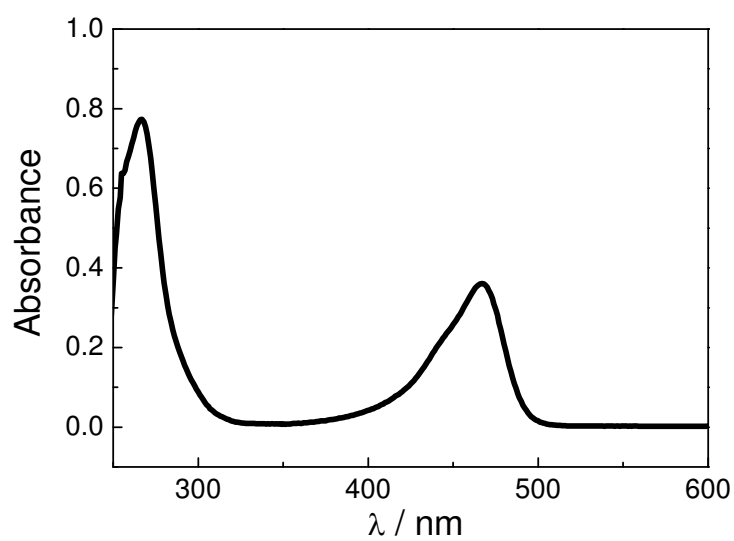

(b)

**Figure S2.** (a) UV-vis spectrum of Acridine Yellow G ( $c = 1.0 \times 10^{-5}$  M in DMSO).  
(b) UV-vis spectrum of **1** ( $c = 1.0 \times 10^{-5}$  M in DMSO).

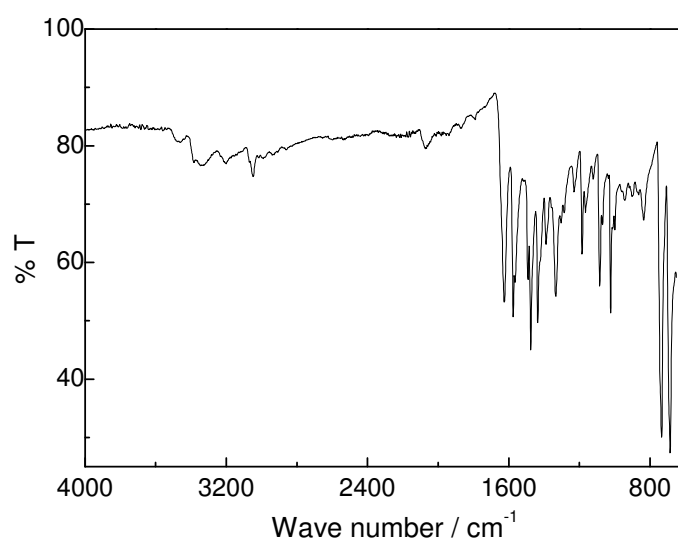

**Figure S3.** FT-IR spectrum of compound **1**.

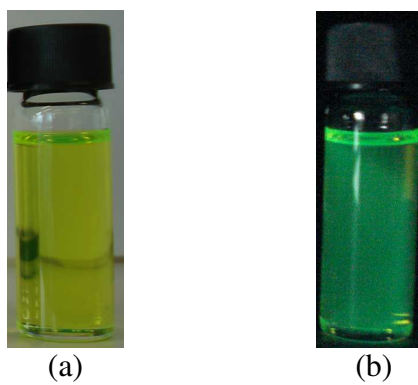

**Figure S4.** Photos of compound **1** in DMSO solution ( $c = 1.0 \times 10^{-6}$  M):  
(a) under daylight and (b) under UV irradiation ( $\lambda = 365$  nm).
